# Supplementary material for: Phylogenetic and Temporal Dynamics of Human Immunodeficiency Virus Type 1 CRF01_AE in China
Source: PubMed Central journal article supplement (PMC3554705; doi:10.1371/journal.pone.0054238), 2013-01-24

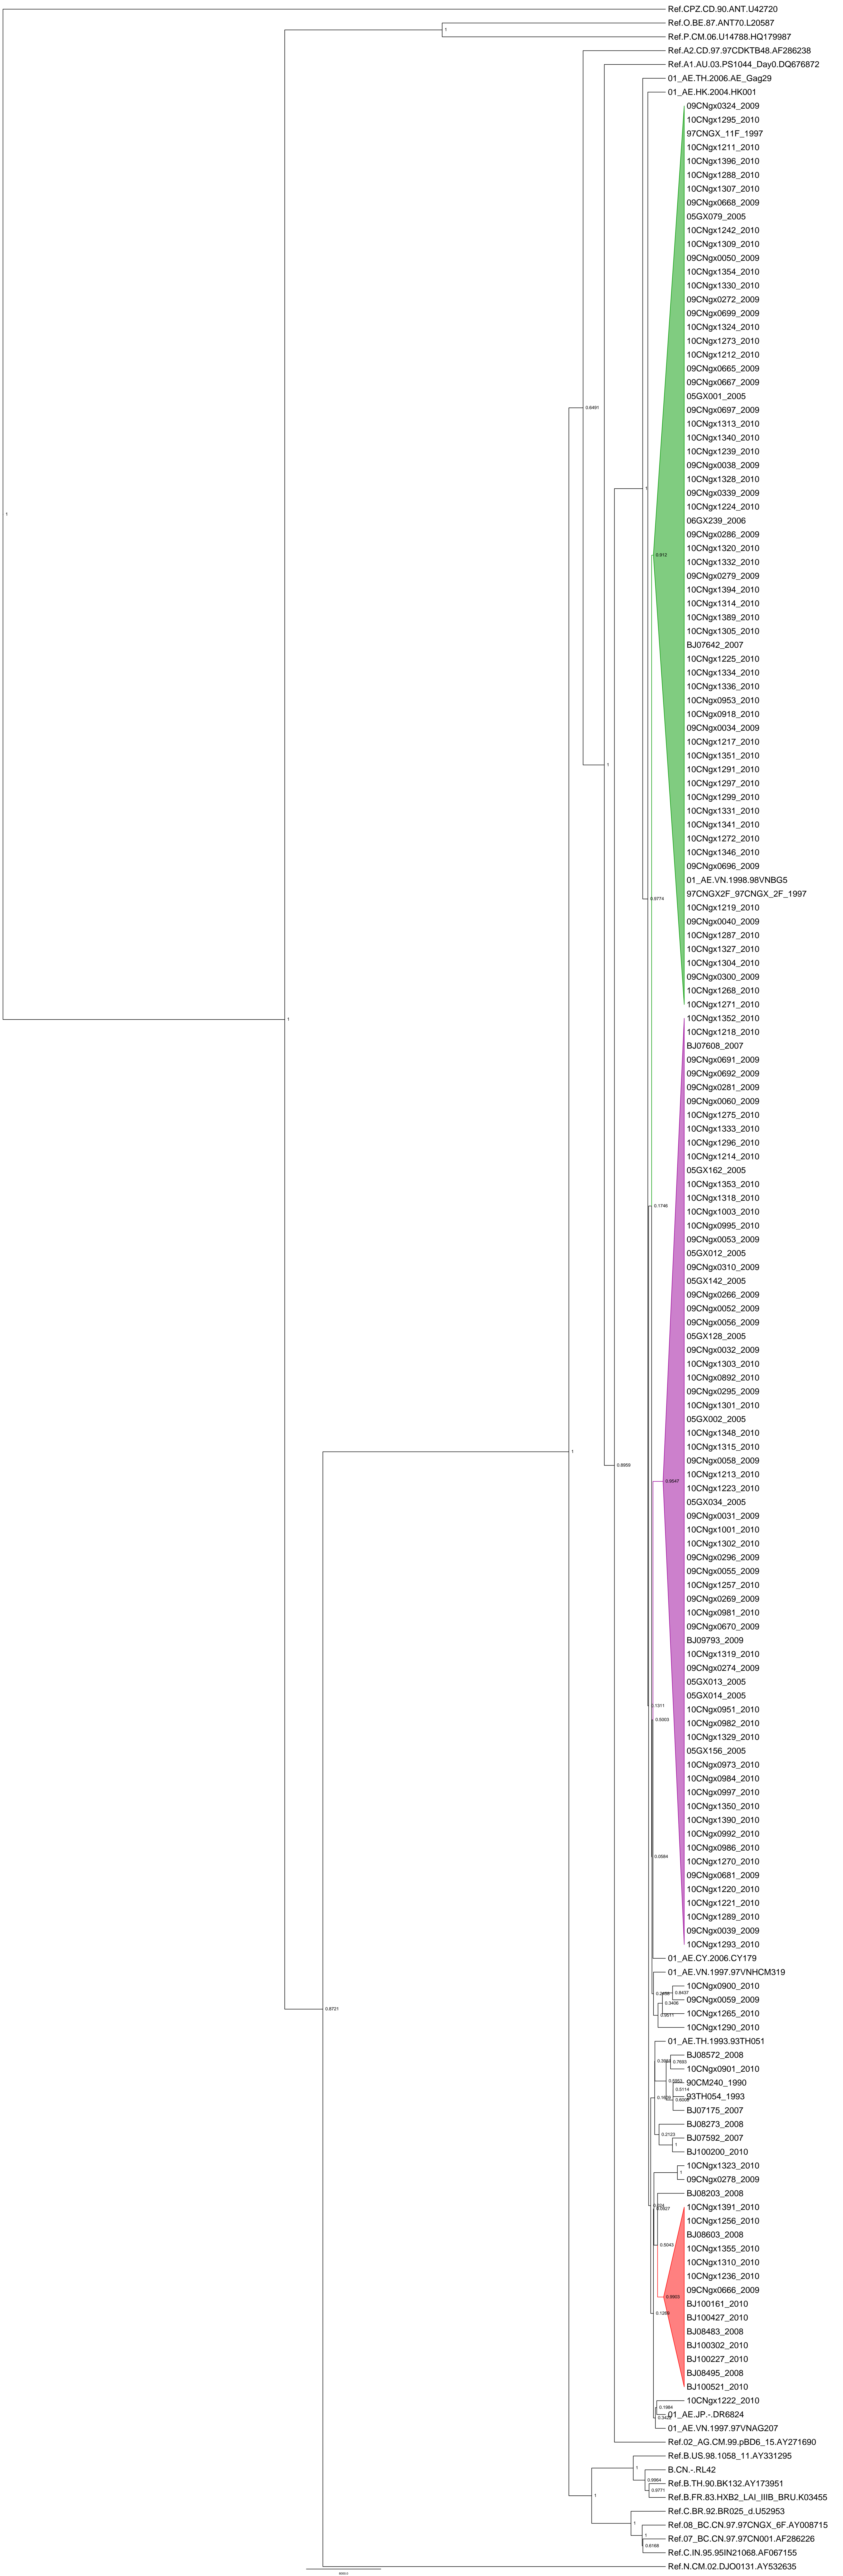

Supplement: pone.0054238.s004.pdf [file pone.0054238.s004.pdf]
